## Lung Volumes and Closing Capacity with Continuous Positive Airway Pressure

Nabil Abboud, M.D.,\* Kai Rehder, M.D.,† Joseph R. Rodarte, M.D.,‡  
Robert E. Hyatt, M.D.§

Total lung capacity, vital capacity, residual volume, and functional residual capacity were determined by body plethysmography and the single-breath oxygen ( $\text{SBO}_2$ ) test was performed at 0, 5, and 11 cm  $\text{H}_2\text{O}$  continuous positive airway pressure in healthy, awake, seated, spontaneously breathing subjects. Mean values for the absolute lung volume at which phase IV of the  $\text{SBO}_2$  test begins (closing capacity) did not change significantly with continuous positive airway pressure at 5 or 11 cm  $\text{H}_2\text{O}$ . Mean total lung capacity, functional residual capacity, and residual volume increased significantly, and the mean closing volume, the lung volume above residual volume at which phase IV begins, decreased significantly with 11 cm  $\text{H}_2\text{O}$  continuous positive airway pressure; differences at 5 cm  $\text{H}_2\text{O}$  were not significant. The slope of the alveolar nitrogen plateau (phase III) obtained during the  $\text{SBO}_2$  test did not change with continuous positive airway pressure. (Key words: Lung; closing capacity; Ventilation, mechanical; closing capacity.)

ARTERIAL HYPOXEMIA is said to occur during tidal breathing if closing capacity (CC)<sup>1</sup>

exceeds functional residual capacity (FRC).<sup>1</sup> The marked decrease in FRC frequently observed in patients with acute respiratory failure<sup>2</sup> might therefore lead to arterial hypoxemia during tidal breathing. Indeed, the improvement in arterial oxygen levels associated with continuous positive airway pressure (CPAP) during spontaneous breathing or with positive end-expiratory pressure (PEEP) during mechanical ventilation has been attributed, at least in part, to an increase in FRC,<sup>3</sup> which apparently re-establishes the normal relationship between FRC and CC. An optimal effect of CPAP or PEEP on pulmonary gas exchange can be expected if FRC increases and CC remains unaffected or becomes smaller. A communication recently published<sup>4</sup> and discussed<sup>5</sup> in this Journal stated that CC\*\* increased with CPAP: when airway pressure was increased from 0 to 10 cm  $\text{H}_2\text{O}$  CPAP, marked increases in FRC (1.78 liters) and in CC (0.47 liter) were observed; thus, mean FRC-CC increased by 1.31 liters with CPAP. However, this increase in CC was unexpected and was attributed to the

\* Resident in Anesthesiology, Mayo Graduate School of Medicine (University of Minnesota).

† Consultant, Department of Anesthesiology; Head, Section of Anesthesia Research, Mayo Clinic and Mayo Foundation; Associate Professor of Anesthesiology, Mayo Medical School.

‡ Consultant, Department of Internal Medicine, Division of Thoracic Diseases, Mayo Clinic and Mayo Foundation; Instructor in Medicine, Mayo Medical School.

§ Consultant, Department of Internal Medicine, Division of Thoracic Diseases; Head, Section of Thoracic Research, Department of Internal Medicine, Division of Thoracic Diseases, Mayo Clinic and Mayo Foundation; Professor of Physiology and Medicine, Mayo Medical School.

Received from the Mayo Clinic and Mayo Foundation, Rochester, Minnesota 55901. Accepted for publication May 22, 1974. Supported in part by Research Grants HL-12090 and HL-12229 from the National Institutes of Health, Public Health Service, and by a grant from the Parker B. Francis Foundation.

Address reprint requests to Dr. Rehder.

§ Closing capacity is the absolute lung volume at which phase IV of the single-breath oxygen test begins; closing volume is the volume above residual volume at which phase IV begins.

\*\* In that communication,<sup>4</sup> "CV (1)" is the same as "CC" in this paper.

### ABBREVIATIONS

|                     |                                       |
|---------------------|---------------------------------------|
| CC                  | = closing capacity                    |
| CPAP                | = continuous positive airway pressure |
| CV                  | = closing volume                      |
| FRC                 | = functional residual capacity        |
| MEFV                | = maximal expiratory flow volume      |
| $P_{ao}$            | = pressure at the airway opening      |
| PEEP                | = positive end-expiratory pressure    |
| RV                  | = residual volume                     |
| $\text{SBO}_2$ test | = single-breath oxygen test           |
| TLC                 | = total lung capacity                 |
| VC                  | = vital capacity                      |
| $V_{th}$            | = thoracic gas volume                 |

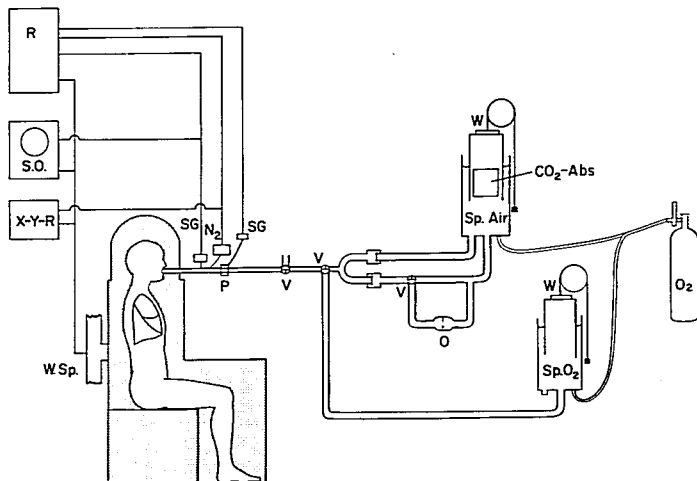

FIG. 1. Breathing circuit. W. Sp. = wedge spirometer; SG = strain gauge (SG closest to mouth is PM-131 for measurement of  $P_{ao}$ );  $N_2$  = nitrogen meter; P = pneumotachograph; V = three-way valves; O = 3-mm-diameter orifice; Sp. Air = air-filled spirometer; Sp.  $O_2$  =  $O_2$ -filled spirometer; W = weights;  $CO_2$ -Abs =  $CO_2$  absorber; R = recorder; S.O. = storage oscilloscope; X-Y-R = X-Y recorder;  $O_2$  = tank containing compressed analyzed oxygen.

large increase, 0.81 liter, in residual volume (RV). In that study, FRC was determined at 0 cm  $H_2O$  airway pressure and the changes in FRC with CPAP were measured from the displacement of the weighted spirometer bell.

Because accurate determination of the absolute lung volume is critical for the estimation of CC, RV, and total lung capacity (TLC), it seemed important to measure the effects of CPAP on CC and lung volumes in normal man in a body plethysmograph to achieve conditions such that absolute lung volumes could be determined repeatedly. When we did these studies, we found no increase in CC with CPAP and observed an increase of only 0.2 liter in the mean values of RV and TLC, a finding that agrees with the results of Rahn and co-workers.<sup>6</sup>

## Methods

Total lung capacity (TLC), its subdivisions (RV, VC, FRC), and closing volume (CV) were determined at 0, 5 (range, 4.5 to 6.0), and 11

(range, 10.0 to 12.0) cm  $H_2O$  CPAP in four subjects (ages, 26 to 43 years; heights, 1.63 to 1.83 m; weights, 64 to 93 kg) and at 0 and 11 cm  $H_2O$  CPAP in five additional subjects (ages, 30 to 45 years; heights, 1.58 to 1.88 m; weights, 59 to 83 kg). Maximal expiratory flow-volume (MEFV) curves were obtained for five of the nine subjects at 0, 5, and 11 cm  $H_2O$  CPAP.

The breathing circuit (fig. 1) for the study consisted of an air-filled spirometer with  $CO_2$  absorber. To maintain expiratory flow rates of approximately 0.5 liter/s during the single-breath oxygen ( $SB O_2$ ) test,<sup>7</sup> expiration was directed through a 3-mm-diameter orifice incorporated into a bypass of the expiratory line. An  $O_2$ -filled spirometer served as an  $O_2$  source for the  $SB O_2$  test and could be connected to the circuit by means of a large-bore three-way valve. The desired level of CPAP was achieved by placing weights on the bells of the spirometers. Pressure at the airway opening ( $P_{ao}$ ) (Statham strain gauge PM-131), inspiratory and expiratory flow rates (Fleisch

TABLE 1. Mean Values ( $\pm$ SE) for Total Lung Capacity and Subdivisions (BTPS), Closing Capacity, and Slopes of Phase III at 0, 5, and 11 cm H<sub>2</sub>O Mean Airway Pressure\*

|                                                        | Mean ( $\pm$ SE) Airway Pressure |                 |                 |                  |
|--------------------------------------------------------|----------------------------------|-----------------|-----------------|------------------|
|                                                        | 0                                | 5 $\pm$ 0.4     | 0               | 11 $\pm$ 0.1     |
| TLC (liters)                                           | 6.6 $\pm$ 0.2                    | 6.8 $\pm$ 0.2   | 6.9 $\pm$ 0.3   | 7.1 $\pm$ 0.4†   |
| VC (liters)                                            | 5.2 $\pm$ 0.2                    | 5.2 $\pm$ 0.3   | 5.5 $\pm$ 0.3   | 5.5 $\pm$ 0.3    |
| RV (liters)                                            | 1.4 $\pm$ 0.1                    | 1.6 $\pm$ 0.1   | 1.4 $\pm$ 0.1   | 1.6 $\pm$ 0.1†   |
| FRC (liters)                                           | 3.7 $\pm$ 0.2                    | 4.1 $\pm$ 0.3   | 3.8 $\pm$ 0.2   | 4.6 $\pm$ 0.2†   |
| CC (liters)                                            | 2.5 $\pm$ 0.2                    | 2.7 $\pm$ 0.2   | 2.5 $\pm$ 0.1   | 2.5 $\pm$ 0.2    |
| CV (per cent VC)                                       | 21 $\pm$ 3                       | 20 $\pm$ 3      | 19 $\pm$ 2      | 17 $\pm$ 2†      |
| FRC-CC (liters)                                        | 1.2 $\pm$ 0.1                    | 1.4 $\pm$ 0.3   | 1.3 $\pm$ 0.2   | 2.1 $\pm$ 0.2†   |
| CC/FRC                                                 | 0.68 $\pm$ 0.03                  | 0.65 $\pm$ 0.05 | 0.67 $\pm$ 0.03 | 0.56 $\pm$ 0.04† |
| Slope of phase III<br>(per cent N <sub>2</sub> /liter) | 0.7 $\pm$ 0.1                    | 0.7 $\pm$ 0.1   | 0.9 $\pm$ 0.1   | 0.9 $\pm$ 0.2    |
| Subjects (number)                                      | 4                                | 4               | 9               | 9                |

\* Abbreviations: TLC = total lung capacity; VC = vital capacity; RV = residual volume; FRC = functional residual capacity; CC = closing capacity; CV = closing volume.

† Significant difference between 0 and 11 cm H<sub>2</sub>O mean airway pressure,  $P < 0.05$ .

pneumotachograph), and N<sub>2</sub> concentrations (N<sub>2</sub> meter, 90 per cent response time, 30 ms) of respired gases were detected distal to the mouthpiece and recorded simultaneously. Apparatus deadspace was 212 ml. Thoracic gas volumes ( $V_{tg}$ ) were determined by a volume-displacement body plethysmograph,<sup>8</sup> and lung volumes (BTPS) were calculated by an on-line computer. Expired N<sub>2</sub> concentrations and gas volumes (wedge spirometer attached to body box) during the SBO<sub>2</sub> test were recorded simultaneously on an analog frequency-modulated tape recorder and later transcribed to an X-Y recorder.

The subject, seated in the body plethysmograph with nose occluded, was connected to the breathing circuit and breathed room air for approximately 4 minutes at ambient mean airway pressure. Each SBO<sub>2</sub> test was initiated by the determination of  $V_{tg}$ , so that all events could be expressed at absolute lung volume. The subject exhaled to RV, inspired 100 per cent O<sub>2</sub> slowly to TLC, and expired immediately at a flow rate of approximately 0.5 liter/s through the 3-mm-diameter orifice. Three satisfactory maneuvers were performed. The process was repeated after 4 minutes at each of the two levels of CPAP.

No correction for the 30-ms time delay of the N<sub>2</sub> meter was used. A visual best-fit straight line was drawn through the last two thirds of phase III, and the beginning of the permanent deviation from this line was taken as the beginning of phase IV. We found it difficult, in some instances, to identify exactly the take-off point of phase IV. To decrease observer bias, the phase IV measurements were carried out independently by four observers who had no knowledge of the experimental condition. In a previous study,<sup>9</sup> one of us (R.E.H.) had measured phase IV in duplicate on the same record and found a mean difference of approximately 1 per cent of the average VC. The slope of phase III is expressed in per cent N<sub>2</sub>/liter expired gas volume.

Statistical significance was determined by Student's two-tailed *t* test for paired data.

## Results

The results are summarized in table 1. Mean values for VC and CC did not change significantly with 5 or 11 cm H<sub>2</sub>O CPAP. Mean values for TLC, FRC, and RV and the difference between FRC and CC (FRC-CC)

increased with CPAP, while mean values for CV and CC/FRC decreased with CPAP. Differences in mean values achieved statistical significance only at 11 cm H<sub>2</sub>O CPAP (fig. 2). The mean ( $\pm$ SE) slopes of phase III obtained during the SBO<sub>2</sub> test were  $0.7 \pm 0.1$  and  $0.9 \pm 0.1$  per cent N<sub>2</sub>/liter at ambient mean airway pressure in the four and nine subjects, respectively; the slope was unchanged with CPAP. We could detect no consistent effect of CPAP on the MEFV curve.

### Discussion

Although Craig and McCarthy<sup>4</sup> have reported a mean increase in CC of 0.47 liter with 10 cm H<sub>2</sub>O CPAP, we found no change in mean CC with 11 cm H<sub>2</sub>O CPAP.

Consideration of the determinants of CC suggests no reason that CC should increase with CPAP. As measured by the SBO<sub>2</sub> test, CC depends on 1) the vertical differences in regional RV/TLC ratios, 2) the distribution of the inspired deadspace gas, and 3) the sequence of regional lung emptying. Since CC is the same whether inspiration is initiated from RV or FRC,<sup>9</sup> the increase in RV with CPAP should not affect CC. Likewise, the small increase in TLC should have little if any effect on the vertical gradient of alveolar N<sub>2</sub> concentration.

A change in the regional pressure-volume behavior of the lung could change regional RV/TLC ratios and the sequence of emptying. However, we found no change in the overall lung pressure-volume curve as estimated with the esophageal balloon technique (Rehder *et al.*, unpublished data). It seems unlikely that there could be appreciable changes in regional lung pressure-volume behavior that fortuitously would result in the same overall pressure-volume curve. Similarly, we found no change in the vertical gradient of the transpulmonary pressure with CPAP in awake man (Rehder *et al.*, unpublished data), unlike the observations by Agostoni and associates<sup>10,11</sup> in anesthetized animals. MEFV curves are another means of assessing the overall mechanical behavior of the lung and are dependent on the lung pressure-volume curve.<sup>12,13</sup> We found no change in the MEFV curve with CPAP.

Lemelin and co-workers<sup>14</sup> showed that the

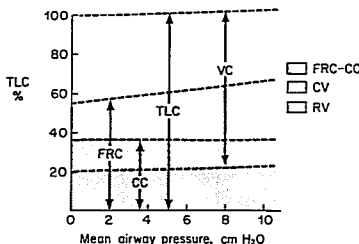

FIG. 2. Total lung capacity (TLC) and subdivisions (expressed as percentage of control TLC) at ambient (zero) and positive mean airway pressure. Note the decrease in closing volume (CV) and the related increase in residual volume (RV), resulting in an unchanged closing capacity (CC). Note also the small increase in TLC, which was similar to that of RV, resulting in an unchanged vital capacity (VC).

distribution of inspired gas was not significantly affected by CPAP. In our study, the slope of phase III was not changed by CPAP, suggesting that the intrapulmonary distribution of inspired gas and the sequence of emptying during expiration were unchanged with CPAP. In summary, it appears that CC should not increase with CPAP in normal man.

What then is the cause for the difference between our finding of no increase in CC with CPAP and the opposite finding by Craig and McCarthy?<sup>4</sup> Both studies showed that VC was unchanged and that CV decreased with CPAP. Clearly, then, the difference lies in the measurement of the absolute lung volume. Craig and McCarthy<sup>4</sup> determined the absolute volume of FRC at ambient airway pressure. FRC during CPAP was measured from the displacement of the weighted spirometer bell, corrected for the compression volume of the system. They found an increase of 1.78 liters with 10 cm H<sub>2</sub>O CPAP. This increase is considerably greater than what has been reported<sup>15</sup> in a previous study utilizing the weighted spirometer and also is greater than what would be anticipated from the data of Rahn and co-workers.<sup>6</sup> Both these studies<sup>6,15</sup> pointed out that, if special efforts are not made to achieve complete muscular relaxation, respiratory reflexes tend to diminish the increase in FRC with CPAP. Our finding of a mean increase

in FRC of 0.8 liter, which is lower than the increase (1.1 liters) that would be predicted from the normal compliance of the respiratory system (0.1 liter/cm H<sub>2</sub>O),<sup>16</sup> is consistent with incomplete muscular relaxation.

If the increase of the FRC were overestimated in Craig and McCarthy's study,<sup>4</sup> TLC, RV, and CC would be overestimated by the same amount. The increases in TLC and RV in Craig and McCarthy's study exceed the increases of TLC and RV in our study by an amount approximately the same as the increase in CC they reported. The increases of RV and TLC that we observed are consistent with the data of Rahn and co-workers.<sup>6</sup>

In conclusion, we have reservations about the changes in lung volumes and closing capacity reported by Craig and McCarthy.<sup>4</sup> Our data show that, in normal man, closing capacity is not increased by continuous positive airway pressure.

### References

1. Craig DB, Wahba WM, Don HF, et al: "Closing volume" and its relationship to gas exchange in seated and supine positions. *J Appl Physiol* 31:717-721, 1971
2. Pontoppidan H: Treatment of respiratory failure in nonthoracic trauma. *J Trauma* 8:938-945, 1968
3. Ashbaugh DG, Petty TL, Bigelow DB, et al: Continuous positive-pressure breathing (CPPB) in adult respiratory distress syndrome. *J Thorac Cardiovasc Surg* 57:31-40, 1969
4. Craig DB, McCarthy DS: Airway closure and lung volumes during breathing with maintained airway positive pressures. *ANESTHESIOLOGY* 36:540-543, 1972
5. Fairley HB: Airway closure (editorial). *ANESTHESIOLOGY* 36:529-532, 1972
6. Rahn H, Otis AB, Chadwick LE, et al: The pressure-volume diagram of the thorax and lung. *Am J Physiol* 146:161-178, 1946
7. Anthonisen NR, Danson J, Robertson PC, et al: Airway closure as a function of age. *Respir Physiol* 8:53-65, 1969/70
8. Potter WA, Olafsson S, Hyatt RE: Ventilatory mechanics and expiratory flow limitation during exercise in patients with obstructive lung disease. *J Clin Invest* 50:910-919, 1971
9. Hyatt RE, Okeson CC, Rodarte JR: Influence of expiratory flow limitation on the pattern of lung emptying in normal man. *J Appl Physiol* 35:411-419, 1973
10. Agostoni E, D'Angelo E, Bonanni MV: Topography of pleural surface pressure above resting volume in relaxed animals. *J Appl Physiol* 29:297-306, 1970
11. Agostoni E, Miserocchi G: Vertical gradient of transpulmonary pressure with active and artificial lung expansion. *J Appl Physiol* 29:705-712, 1970
12. Mead J, Turner JM, Macklem PT, et al: Significance of the relationship between lung recoil and maximum expiratory flow. *J Appl Physiol* 22:95-108, 1967
13. Stubbs SE, Hyatt RE: Effect of increased lung recoil pressure on maximal expiratory flow in normal subjects. *J Appl Physiol* 32:325-331, 1972
14. Lemelin J, Ross WRD, Martin RR, et al: Regional lung volumes with positive pressure inflation in erect humans. *Respir Physiol* 16:273-281, 1972
15. Cherniack RM, Brown E: A simple method for measuring total respiratory compliance: Normal values for males. *J Appl Physiol* 20: 87-91, 1965
16. Agostoni E, Mead J: Statics of the respiratory system, *Handbook of Physiology. Section 3: Respiration*. Edited by WO Fenn, H Rahn. Washington D.C., American Physiological Society, 1964, vol 1, pp 387-409
